# Supplementary material for: Metabolic Profiling of Rheumatoid Arthritis Neutrophils Reveals Altered Energy Metabolism That Is Not Affected by JAK Inhibition
Source: MDPI journal article supplement (doi:10.3390/metabo12070650), 2022-07-15
Supplement: s1 [file s1]

## **Supplementary Methods**

### **Chemotaxis Assay**

The chemotaxis assay was carried out in 24-well tissue culture plates (coated with 12mg/mL polyhema to prevent cell adhesion) using hanging chamber inserts with a 3µM porous membrane, as previously described [18]. fMLP ( $10^{-8}$ M) was added to RPMI media in the bottom chamber. Neutrophils ( $10^6$ /mL) were incubated with or without tofacitinib, baricitinib, or pan-JAK inhibitor I (all 200 ng/mL) for 30 min prior to addition to the top chamber and incubated for 90 min at 37 °C and 5% CO<sub>2</sub>. The number of migrated cells after 90 min incubation was measured using a Coulter Counter Multisizer-3 (Beckman Coulter, High Wycombe, UK).

### **Phagocytosis Assay**

Neutrophils ( $10^6$ /mL) were incubated with or without tofacitinib, baricitinib or pan-JAK inhibitor I (all 200 ng/mL) for 30 min prior to the addition of FITC-labelled latex beads (1.1 µm diameter) for 30 min (100:1 ratio beads:cells). Cells were centrifuged at 1000g for 3 mins and resuspended in HBSS prior to analysis on a Beckman Coulter CytoFLEX flow cytometer where 10,000 events were analysed.



## Supplementary Data

**Supplementary Table S1.** List of annotated metabolites from neutrophil spectra. This table reports the total number of annotated peaks for each metabolite and the level of identification based on the metabolite reporting standards set out by the metabolomics society. A representative bin was chosen out of all related annotated peaks and brought forward in the subsequent statistical analysis. HMDB = Human Metabolome Database

| Metabolite                       | HMDB ID     | Number of<br>Peaks<br>Annotated in<br>Spectrum | MSI Level of<br>Identification | Representative<br>Bin |
|----------------------------------|-------------|------------------------------------------------|--------------------------------|-----------------------|
| 2 Hydroxyvaleric acid            | HMDB0001863 | 12                                             | 2                              | 1.3539 - 1.433        |
| 2-Hydroxybutyric acid            | HMDB0000008 | 3                                              | 2                              | 0.9106 - 0.9058       |
| 2-Hydroxy-3-methylpentaonic acid | HMDB0000317 | 24                                             | 2                              | 0.8962 - 0.8504       |
| 3-Hydroxybutyric acid            | HMDB0000011 | 2                                              | 2                              | 1.2241 - 1.2168       |
| 3-Hydroxyisovaleric acid         | HMDB0000754 | 2                                              | 2                              | 1.2572 - 1.2498       |
| Acetamide                        | HMDB0031645 | 1                                              | 2                              | 2.0094 - 2.0039       |
| Acetoic acid                     | HMDB0000060 | 1                                              | 2                              | 2.2674 - 2.2618       |
| Acetone                          | HMDB0001659 | 1                                              | 2                              | 2.2385 - 2.2342       |
| Adipic Acid                      | HMDB0000448 | 7                                              | 2                              | 1.5445 - 1.5401       |
| ADP                              | HMDB0001341 | 6                                              | 1                              | 8.5451 - 8.5407       |
| ATP                              | HMDB0000538 | 9                                              | 1                              | 8.2742 - 8.2719       |

|                   |              |    |   |                 |
|-------------------|--------------|----|---|-----------------|
| Choline           | HMDB0000097  | 1  | 2 | 3.2129 - 3.2046 |
| Cyclic AMP        | HMDB0000058  | 8  | 1 | 6.1548 - 6.1498 |
| D-Glucose         | HMDB0000122  | 62 | 1 | 3.8952 - 3.8917 |
| D-Glutamic Acid   | HMDB00003339 | 36 | 2 | 2.343 - 2.3384  |
| Dimethylamine     | HMDB0000087  | 1  | 1 | 2.7313 - 2.735  |
| D-Mannose         | HMDB0000169  | 10 | 2 | 3.3712 - 3.3685 |
| Ethanol           | HMDB0000108  | 3  | 2 | 1.1995 - 1.195  |
| Formic acid       | HMDB0000142  | 1  | 2 | 8.4626 - 8.4562 |
| Glutathione       | HMDB0000125  | 13 | 2 | 2.5718 - 2.5614 |
| Glycerol          | HMDB0000131  | 7  | 2 | 3.6449 - 3.6424 |
| Glycol            | HMDB0001881  | 2  | 2 | 1.1443 - 1.1381 |
| GTP               | HMDB0001273  | 3  | 2 | 5.9546 - 5.9465 |
| Indoleacetic acid | HMDB0000671  | 5  | 2 | 7.7515 - 7.7414 |
| Inosinic acid     | HMDB0000175  | 5  | 2 | 6.1629 - 6.1548 |
| Isobutyric acid   | HMDB0001873  | 1  | 2 | 1.1137 - 1.1082 |
| Isopropyl alcohol | HMDB0000863  | 3  | 2 | 1.1847 - 1.1759 |
| Lactic acid       | HMDB0000190  | 6  | 1 | 4.1209 - 4.1167 |
| L-Alanine         | HMDB0000161  | 5  | 1 | 1.4826 - 1.4768 |
| L-Arginine        | HMDB0000517  | 28 | 2 | 1.6403 - 1.6349 |

|                 |             |    |   |                 |
|-----------------|-------------|----|---|-----------------|
| L-Aspartic.acid | HMDB0000168 | 17 | 1 | 2.8595 - 2.8542 |
| L-Glutamine     | HMDB0000641 | 26 | 1 | 2.4785 - 2.4733 |
| L-Histidine     | HMDB0000177 | 2  | 1 | 7.0845 - 7.0758 |
| L-Isoleucine    | HMDB0000172 | 21 | 1 | 1.0154 - 1.0059 |
| L-Leucine       | HMDB0000687 | 28 | 1 | 0.9695 - 0.9613 |
| L-Lysine        | HMDB0000182 | 28 | 2 | 3.0323 - 3.0275 |
| L-Methionine    | HMDB0000696 | 12 | 1 | 2.6355 - 2.6264 |
| L-Phenylalanine | HMDB0000159 | 11 | 1 | 7.3427 - 7.3364 |
| L-Proline       | HMDB0000162 | 12 | 2 | 3.3052 - 3.3001 |
| L-Serine        | HMDB0000187 | 23 | 2 | 3.9558 - 3.9528 |
| L-Threonine     | HMDB0000167 | 8  | 1 | 4.2574 - 4.2538 |
| L-Tyrosine      | HMDB0000158 | 9  | 2 | 6.9145 - 6.9107 |
| L-Valine        | HMDB0000883 | 13 | 1 | 0.9934 - 0.9867 |
| Methyl Acetate  | HMDB0015502 | 1  | 2 | 1.9225 - 1.9169 |
| Myo-Inositol    | HMDB0000211 | 14 | 1 | 3.2853 - 3.2821 |
| NAD+            | HMDB0000902 | 10 | 1 | 9.1575 - 9.1485 |
| NADH            | HMDB0001487 | 18 | 2 | 8.2099 - 8.2052 |
| NADP+           | HMDB0000217 | 10 | 2 | 8.1921 - 8.184  |
| Phosphocholine  | HMDB0001565 | 1  | 2 | 3.2284 - 3.2211 |

|                   |             |    |   |                 |
|-------------------|-------------|----|---|-----------------|
| Propionic acid    | HMDB0000237 | 9  | 2 | 1.0745 - 1.0659 |
| Pyroglutamic acid | HMDB0000267 | 30 | 2 | 2.5178 - 2.5141 |
| Saccharopine      | HMDB0000279 | 46 | 2 | 3.0819 - 3.0742 |
| Sarcosine         | HMDB0000271 | 2  | 2 | 2.234 - 2.239   |
| Taurine           | HMDB0000251 | 9  | 1 | 3.4164 - 3.4124 |

**Supplementary Table S2.** PLS-DA validation table. Percentage score of all assessed metrics in the machine learning model with their standard deviation. UNTR = untreated, JAKi = pan JAK inhibitor I, BARI = Baricitinib, TOFA = Tofacitinib.

|         | Accuracy   | Balanced<br>Accuracy | F1 Score     | Precision | Recall     |
|---------|------------|----------------------|--------------|-----------|------------|
| UNTR 0h | 90% (13.7) | 90% (13.7)           | 86.7% (18.3) | 100% (0)  | 80% (27.4) |
| UNTR 2h | 95% (11.2) | 95% (11.2)           | 93.3% (14.9) | 100% (0)  | 90% (22.4) |
| JAKi    | 85% (13.7) | 85% (13.7)           | 80% (18.3)   | 100% (0)  | 70% (27.4) |
| BARI    | 95% (11.2) | 95% (11.2)           | 93.3% (14.9) | 100% (0)  | 90% (22.4) |
| TOFA    | 95% (11.2) | 95% (11.2)           | 93.3% (14.9) | 100% (0)  | 90% (22.4) |

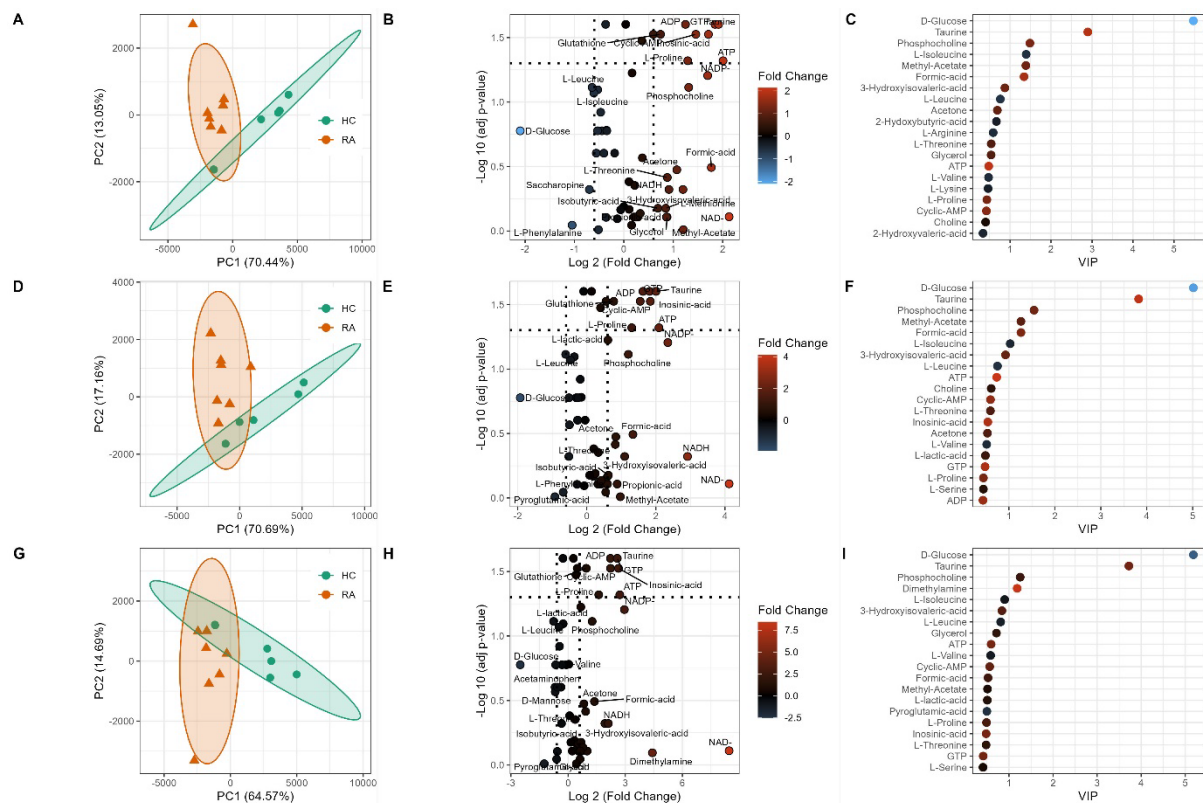

**Supplementary Figure S1.** Metabolomics differences between RA and HC neutrophils with JAK inhibitors. PCA scores plot of HC and RA neutrophils with pan-JAKi (A) Baricitinib (D) and Tofacitinib (G) showing separation on the first principal component (PC). Volcano plot (B,E,H) showing metabolites significantly different between HC and RA neutrophils (adj p-value < 0.05) and the log2 fold change (FC) for each metabolite as indicated by gradient colour scale provided. Variable importance in projection (VIP) (C,F,I) obtained from PLS-DA showing top 20 metabolites for each model.

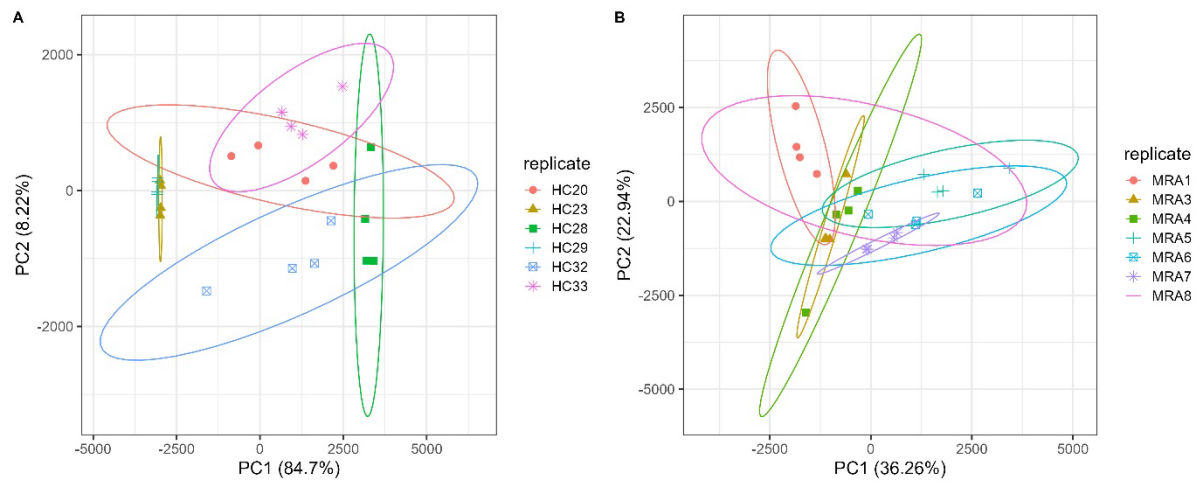

**Supplementary Figure S2.** PCA showing high between-subject variability of neutrophils treated with JAK inhibitors. (HC = healthy control, RA = rheumatoid arthritis).

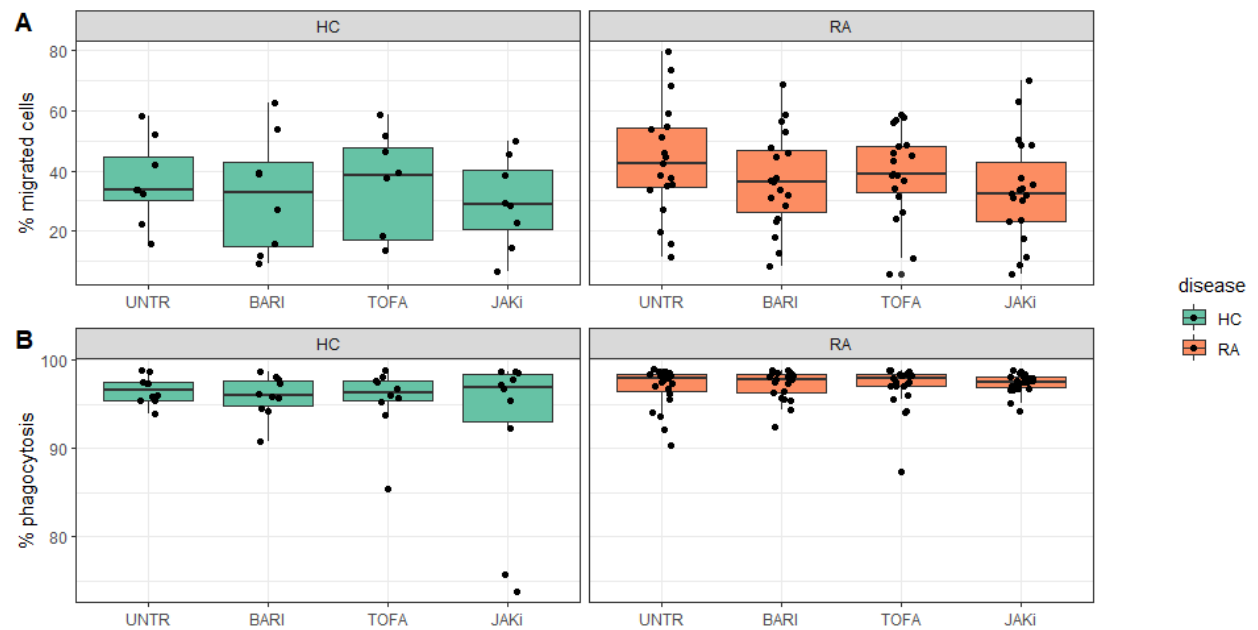

**Supplementary Figure S3.** Effect of JAK inhibitors on neutrophil migration and phagocytosis. (A) Effect of JAK inhibitors on neutrophil chemotaxis towards fMLP. Neutrophils were pre-treated with JAKi for 30 min and then allowed to migrate towards fMLP ( $10^{-8}$ M) for 90 min; (B) effect of JAK inhibitors on neutrophil phagocytosis. Neutrophils were pre-treated with JAKi for 30 min and then incubated with FITC-labelled latex beads for 30 min. None of the inhibitors tested prevented phagocytosis or cell migration. UNTR = untreated, JAKi = pan JAK



inhibitor I, BARI = Baricitinib, TOFA = Tofacitinib.
